# Supplementary material for: Weak chemiluminescence emission during base induced rearrangement of G-factors
Source: Royal Society of Chemistry journal article supplement (doi:10.1039/b715491g), 2008-01-01
Supplement: b715491g.pdf [file b715491g.pdf]

*Supplementary information*

**Chemiluminescence emission during based induced  
rearrangement of G-factors**

**Virginie Bernat,<sup>a</sup> Chantal André<sup>a</sup> and Christiane André-Barrès\*<sup>a</sup>**

**Data for A :**

<sup>1</sup>H and <sup>13</sup>C NMR spectra of **A** at respectively 400MHz and 100.6 MHz in CD<sub>3</sub>OD  
HMBC spectrum of **A**

MS : DCI/NH<sub>3</sub> (CH<sub>2</sub>Cl<sub>2</sub>/MeOH) negative mode

IR spectrum (neat in compressing cell)

**Fluorescence spectra of aldehyde**

**Crystallographic Information Files CIF-A.cif.**

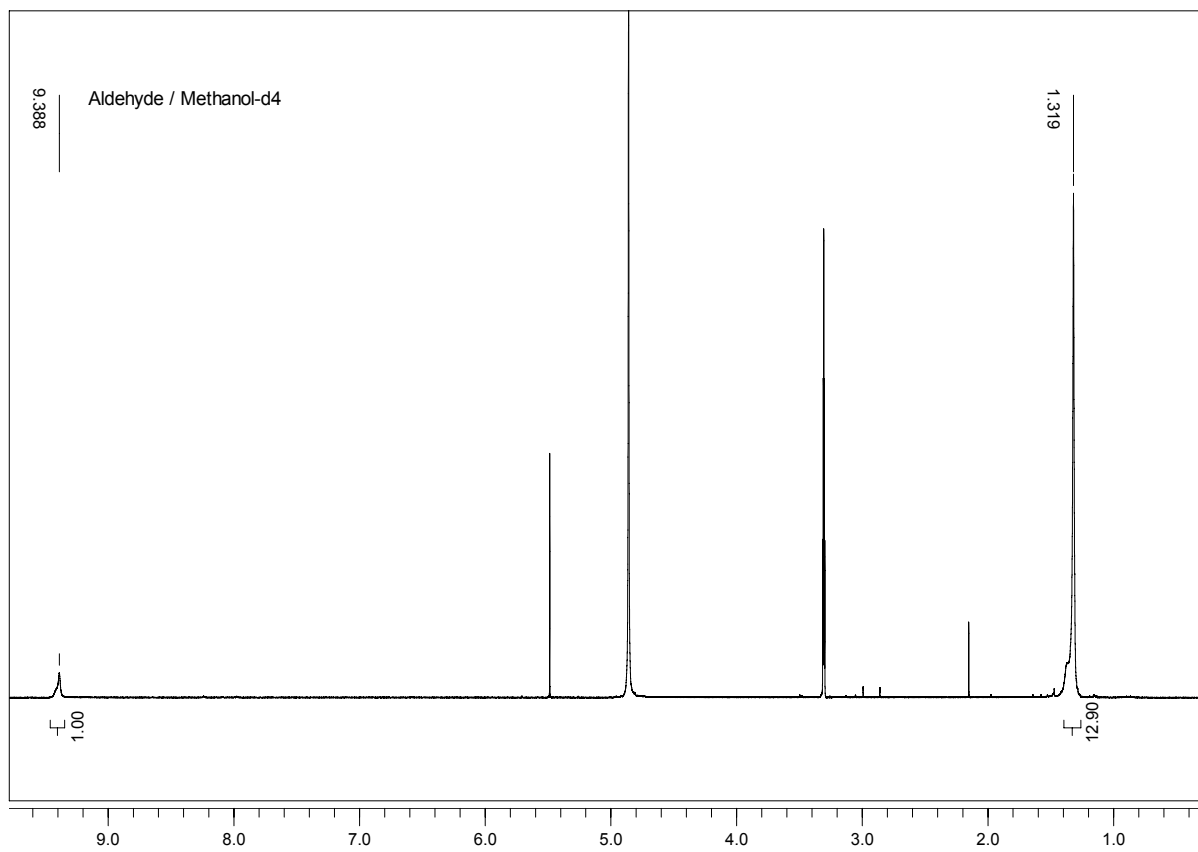

**A** :  $^1\text{H}$  NMR (400MHz  $\text{CD}_3\text{OD}$ )

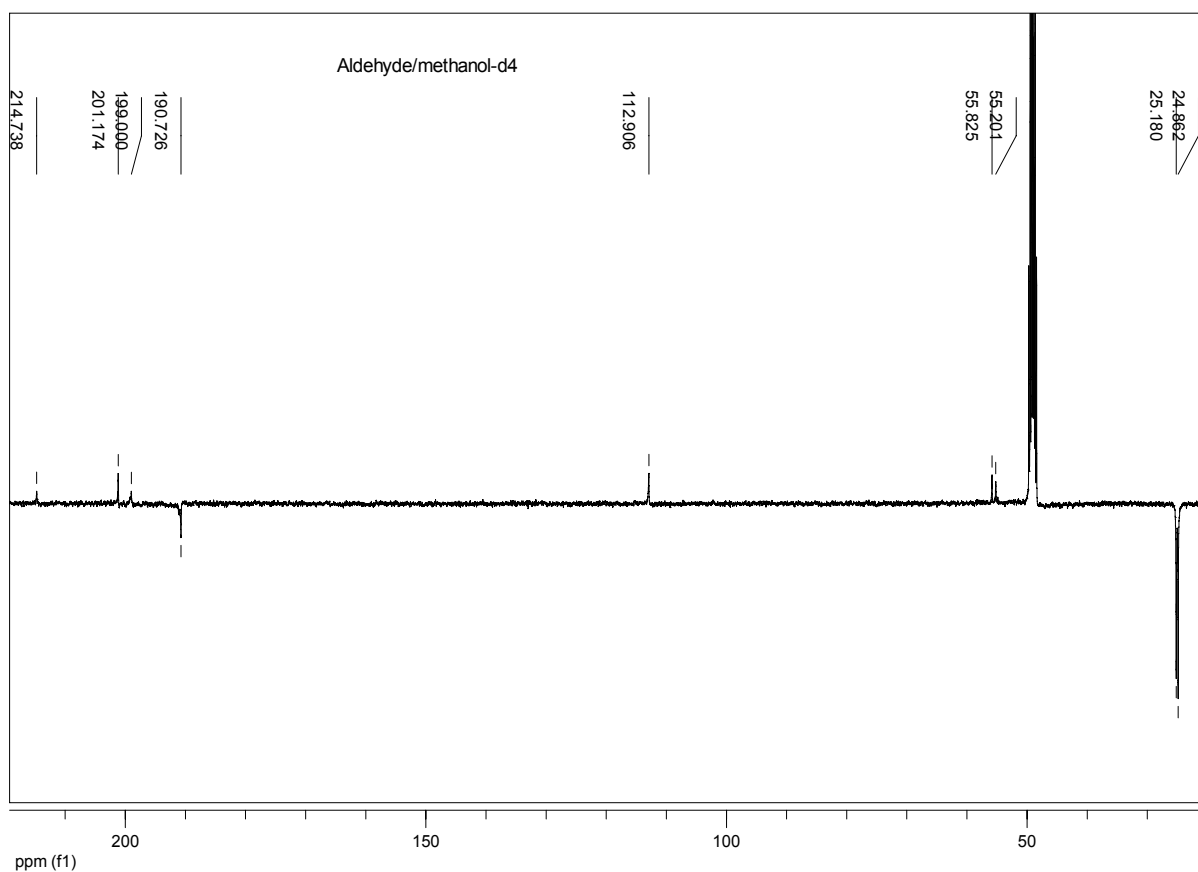

A :  $^{13}\text{C}$  NMR (100.6 MHz  $\text{CD}_3\text{OD}$ )

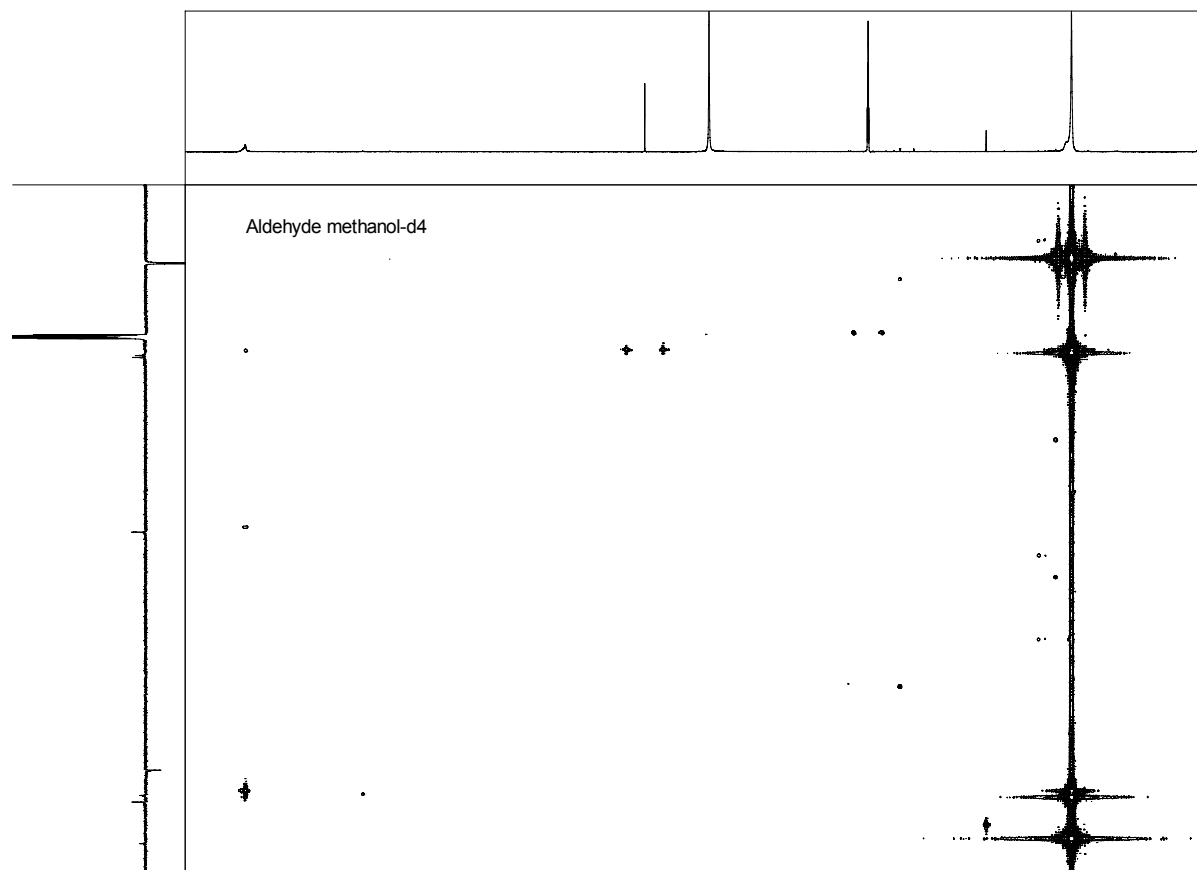

A : HMBC (400MHz, 100.6MHz, CD<sub>3</sub>OD)

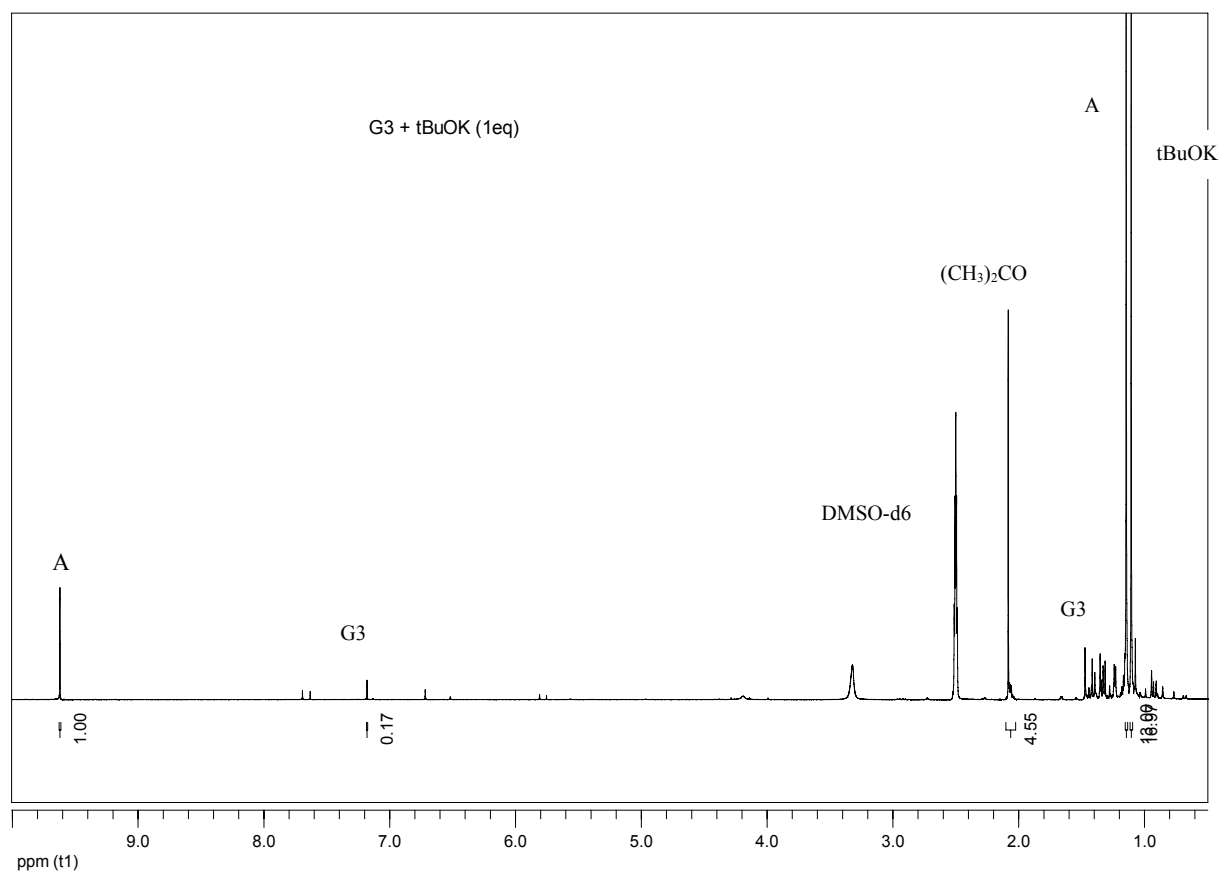

<sup>1</sup>H NMR spectrum (300MHz) of reaction of G3 with tBuOK in DMSO

**MS : DCI/NH<sub>3</sub> (CH<sub>2</sub>Cl<sub>2</sub>/MeOH) negative mode**

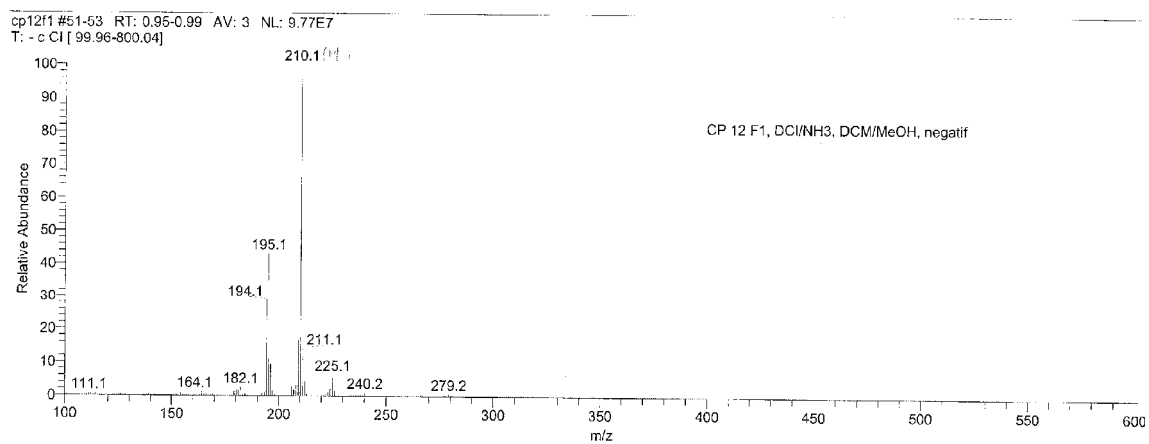

**MS : DCI/NH<sub>3</sub> (CH<sub>2</sub>Cl<sub>2</sub>/MeOH) negative mode**

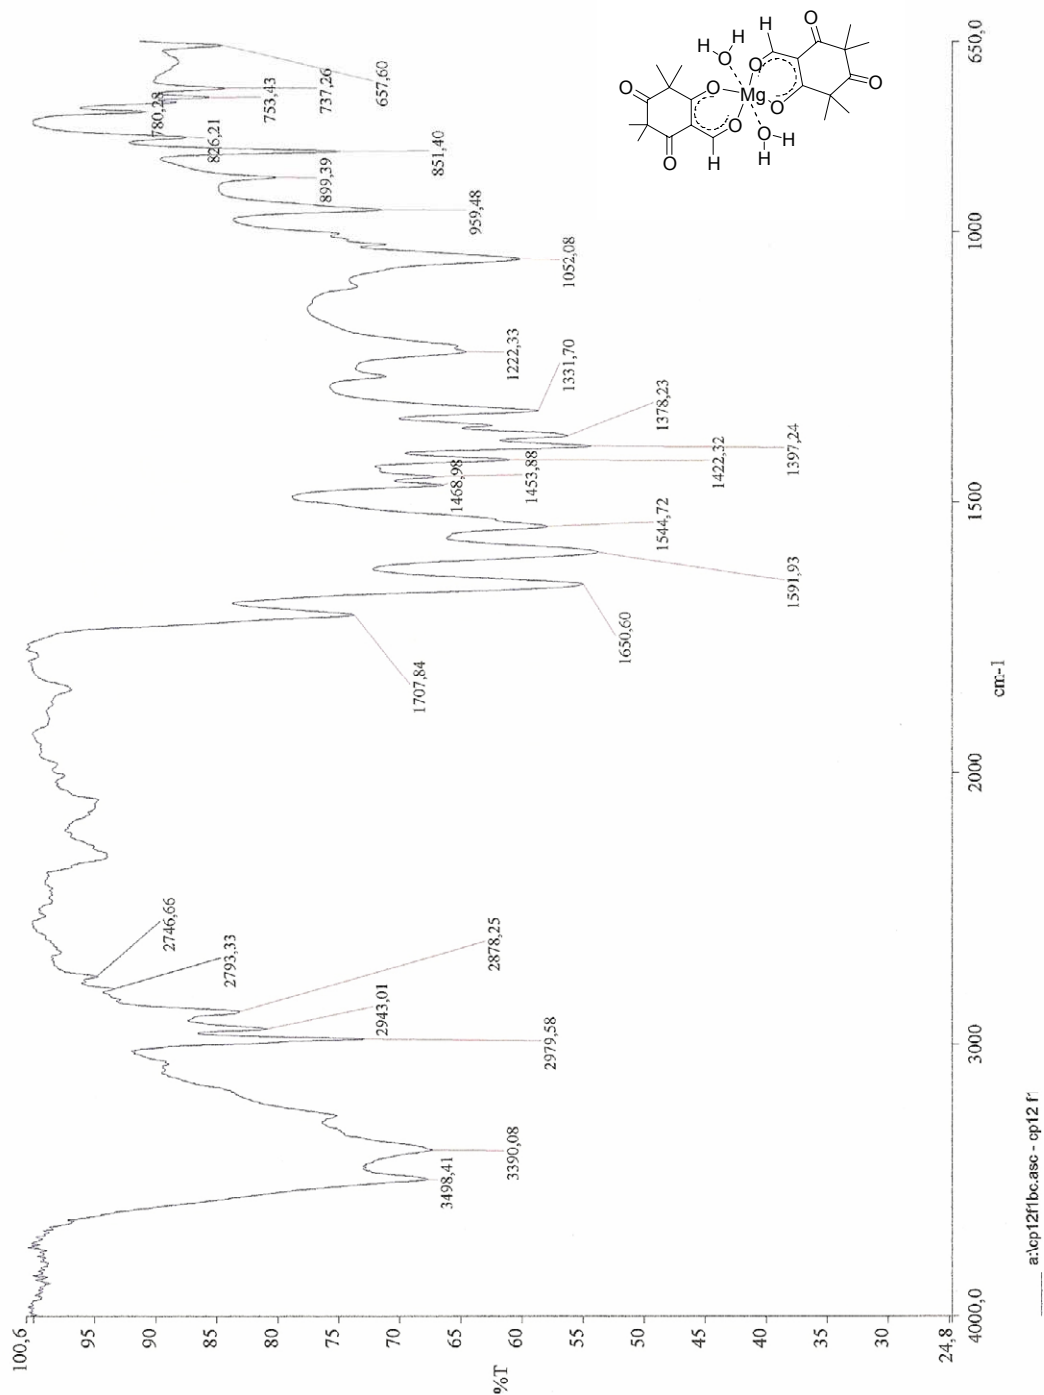

IR spectrum (neat in compressing cell)

***Emitting species***

In basic conditions:

These fluorescence spectra were obtained after recording luminescence scan or kinetics of G3 compound with tBuOK in DMSO.

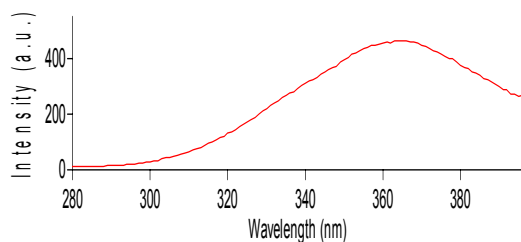

Excitation spectrum of aldehyde + tBuOK in DMSO ( $\lambda_{em}=410$  nm)

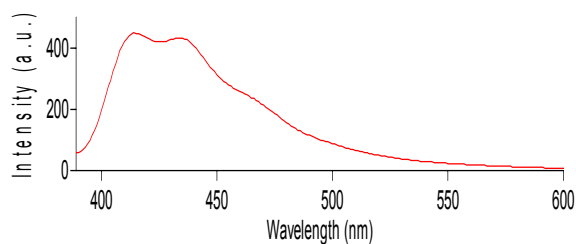

Emission spectrum of aldehyde + tBuOK in DMSO ( $\lambda_{ex}=376$  nm)

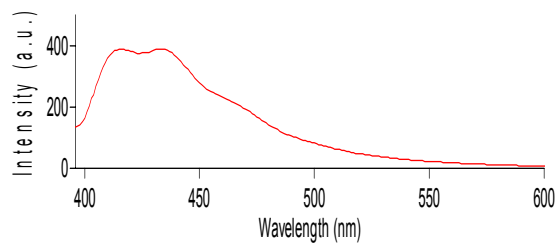

Emission spectrum of aldehyde + tBuOK in DMSO ( $\lambda_{ex}=366$  nm)



In neutral conditions

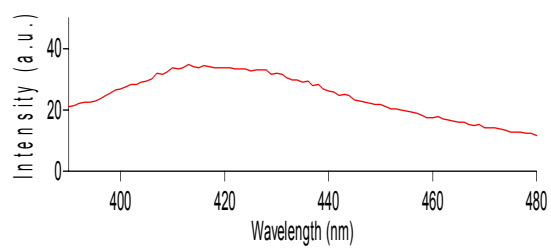

Emission spectrum of aldehyde obtained as a dimer of Mg in DMSO ( $\lambda_{\text{ex}} = 256 \text{ nm}$ )
